# Supplementary material for: Catalytic conversion of cellulose to C2–C3glycols by dual association of a homogeneous metallic salt and a perovskite-supported platinum catalyst
Source: Royal Society of Chemistry journal article supplement (doi:10.1039/c5cy01782c), 2016-01-01
Supplement: c5cy01782c1.pdf [file c5cy01782c1.pdf]

# Supporting Information

## **Catalytic conversion of cellulose to C<sub>2</sub>-C<sub>3</sub> glycols by a dual association of a homogeneous metallic salt and a perovskite- supported platinum catalyst**

E. Girard,<sup>a,\*</sup> D. Delcroix<sup>a</sup> and A. Cabiac<sup>a</sup>

<sup>a</sup> IFP Energies Nouvelles, Rond-Point de l'Echangeur de Solaize, BP3, 69360 Solaize, France

\* To whom correspondence should be addressed : [etienne.girard@ifpen.fr](mailto:etienne.girard@ifpen.fr)

## Supplementary data relative to effluent characterization

GC-FID results (Entry 11 in Table 2)

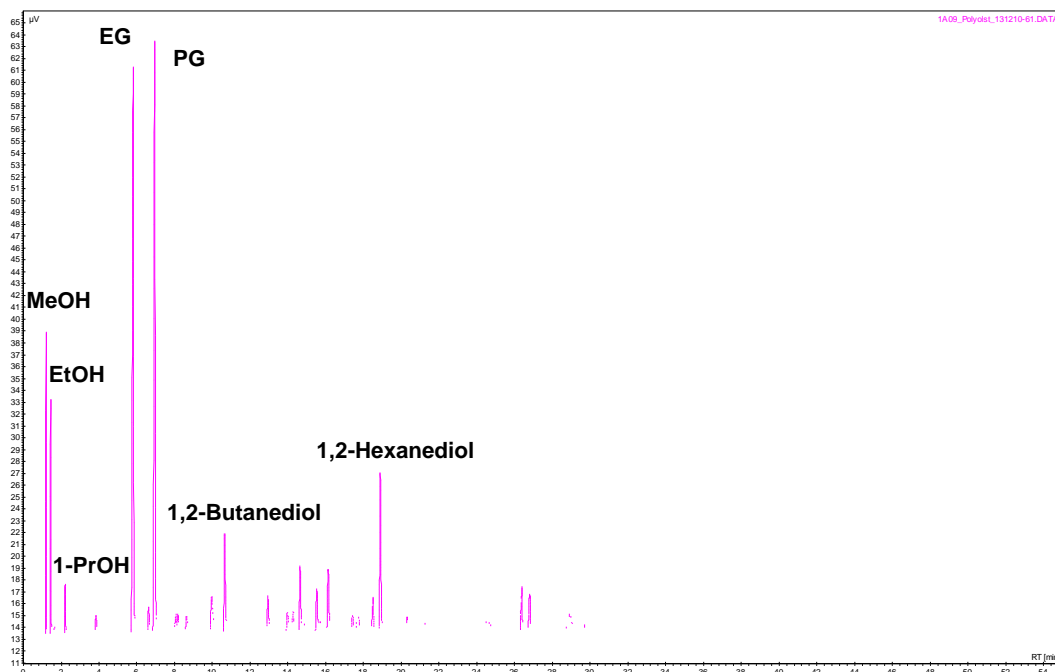

Figure S1. GC-FID chromatogram of a effluent obtained with the  $\text{CeCl}_3 \cdot 7\text{H}_2\text{O}$  plus Pt/BaZrO<sub>3</sub> system at 230°C, a 25 bar H<sub>2</sub> pressure for 12 hours.

<sup>13</sup>C NMR results (Entry 6 in Table 1)

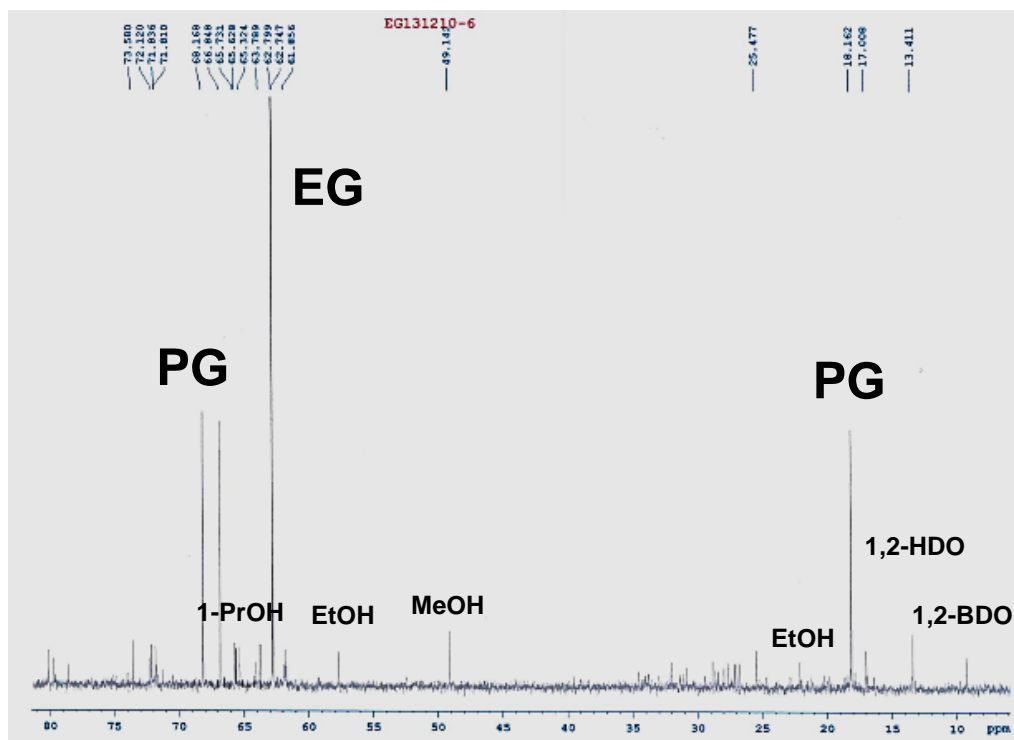

Figure S2. <sup>13</sup>C NMR spectrum of a effluent obtained with the  $\text{CeCl}_3 \cdot 7\text{H}_2\text{O}$  plus Pt/BaZrO<sub>3</sub> system at 230°C, a 25 bar H<sub>2</sub> pressure for 12 hours (recorded at room temperature on a Bruker AV 300 spectrometer (<sup>13</sup>C : 75 MHz)).

## Supplementary data for the spent Pt/BaZrO<sub>3</sub> catalyst after a hydrothermal stability test

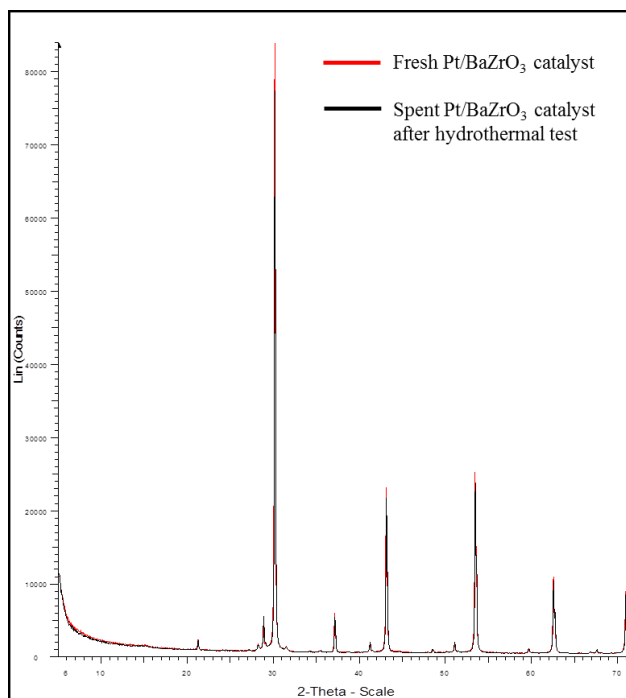

Figure S3. Overlays of DRX spectra for Pt/BaZrO<sub>3</sub> samples before/after a hydrothermal stability test at 230°C under a H<sub>2</sub> pressure of 25 bar in presence of CeCl<sub>3</sub>·7H<sub>2</sub>O for 18 hours.

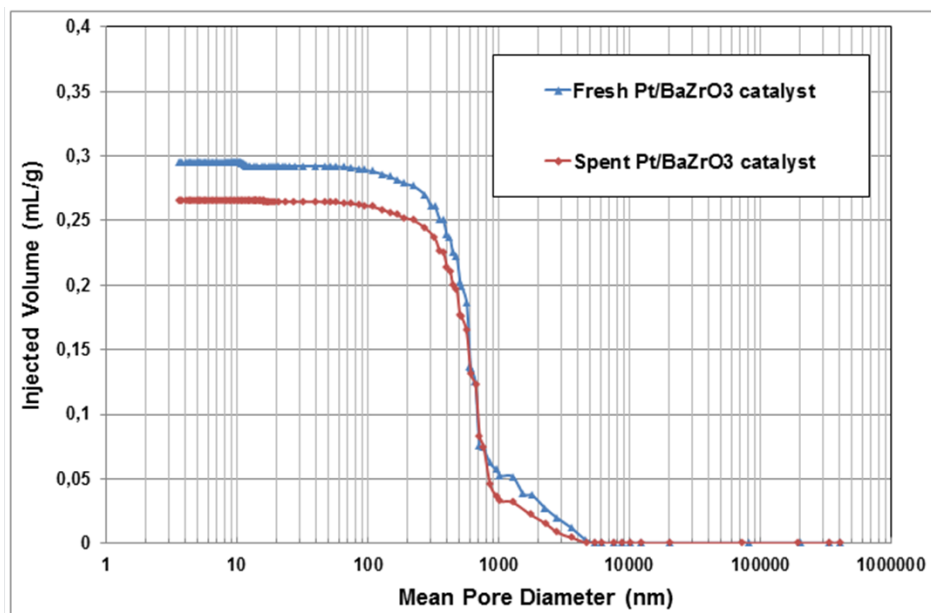

Figure S4. Overlays of mercury porosimetry curves for Pt/BaZrO<sub>3</sub> samples before/after a hydrothermal stability test at 230°C under a H<sub>2</sub> pressure of 25 bar in presence of CeCl<sub>3</sub>·7H<sub>2</sub>O for 18 hours.

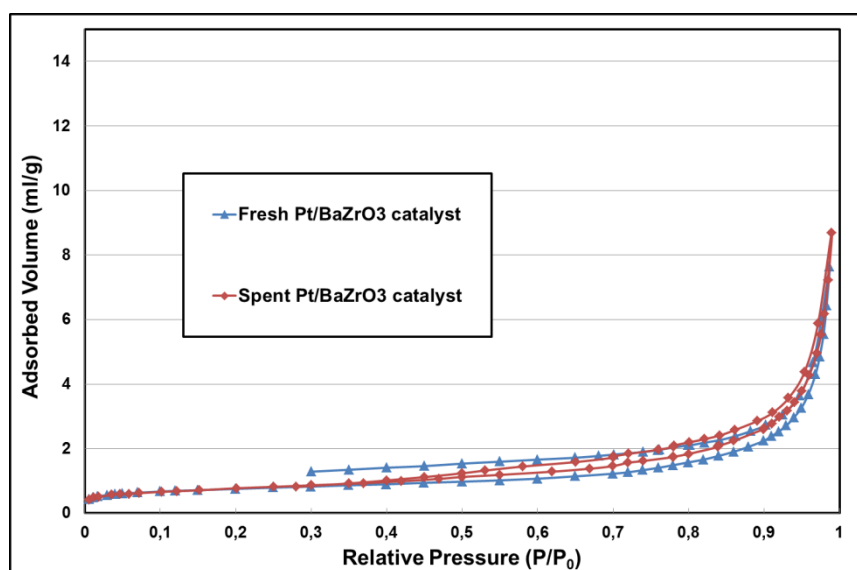

Figure S5. Overlays of N<sub>2</sub> adsorption-desorption isotherms for Pt/BaZrO<sub>3</sub> samples before/after a hydrothermal stability test at 230°C under a H<sub>2</sub> pressure of 25 bar in presence of CeCl<sub>3</sub>·7H<sub>2</sub>O for 18 hours.

| Element | ppm determined by ICP/MS | Relative weight percentage to the fresh catalyst composition |
|---------|--------------------------|--------------------------------------------------------------|
| Pt      | < 0.2                    | <0.25wt%                                                     |
| Ba      | 519 +/- 26               | 1.0wt%                                                       |

Table S1. ICP/OES measurements for the aqueous effluent analyzed after a hydrothermal stability test at 230°C under a H<sub>2</sub> pressure of 25 bar in presence of CeCl<sub>3</sub>·7H<sub>2</sub>O for 18 hours.
